# Supplementary material for: Using Next Generation RAD Sequencing to Isolate Multispecies Microsatellites for Pilosocereus (Cactaceae)
Source: PLoS One. 2015 Nov 11;10(11):e0142602. doi: 10.1371/journal.pone.0142602 (PMC4641700; doi:10.1371/journal.pone.0142602)
Supplement: S1 Table — (XLSX) [file pone.0142602.s001.xlsx]

## Sheet: Sheet1
Table S1. Potential amplifiable microsatellites for five species of Pilosocereus genus. The number and content of the repeat units found among individuals and the species from which they were isolated are shown.
Species	Locus	Repeat Motif	Forward Primer sequence (5'-3')	Reverse Primer sequence (5'-3')	Size
P. aurisetus	ParSSR100	(AG)3 (GA)3 (AG)6	TGGCGGAACTGAATTGGTTG	CCCATTCACAAACTAGCCCG	100
	ParSSR107	(TC)10/ (TC)9 TT/(TC)7 CC TC TT	GGATAACCTGCATTGCTTGCG	GTCAGCTATGACATTAGAG	107
	ParSSR130	(TGA)9	CGTTGATGCTCCCATGGTAG	AGCGAGAAGGATGAGTCACG	130
	ParSSR150	(TC)15,17/(TC)16 TT (TC)4	CTTGTCGGTGGCAAACTAGC	CTTCGGCCCTTCTTCTTTGC	150154162
	ParSSR176	(TC)7	CAGAGGGATGGTGAAGGAGG	AGGCATACAATAACGCTCACTG	176
	ParSSR181	(AG)6	TCGAGACCCAGAAACGAGTC	CACTCTCCTCCCAGAACTCTC	181
	ParSSR192	(GA)9	GCATGCTTTATACCCGACCT	CGTCATCACGTTTTGATACCC	192
	ParSSR197	(AG)6 (TG)2	ACGAACCCTAACCCTAACCG	CGAATGCTGGCAATCATATGAAC	197
	ParSSR199	(CT)3 CC (CT)6 TC CT	CCCTTCAGCAGCACAAAGAG	AGAACAACGCGTCAAAGAGG	199
	ParSSR202	(GA)8,10/(GA)2 GG (GA)5	CAGATTACCGCCAGAGACTC	AAGAATTGGACGAGGGCCTC	202-206
	ParSSR203	(CAT)7-8	TTCACAGTTCGACCATCAGC	TCAGCCCAACAACTACTGGC	203-206
	ParSSR205	(AG)8/(AG)7 CG	ACGAAGCTCAATCACACCAG	ATTGAAACCTGGCGATGCTC	205
	ParSSR241	(GA)7-8	CACCAAGGGCGTACAATGAC	CAGCGCCGTCATAATTGCTC	241-243
P. machrisii	PmcSSR115	(GA)9-10	GGAGTCAAGGATTAGGAAG	CTCTCCTCTGCTTCGCATATC	115-117
	PmcSSR118	(AG)7	GGGAAGATTAGAGGAAATTTGAG	CTCATTCGACTTCCTCCATTTTC	118
	PmcSSR122	(TC)8	GGTTACCGGAATTGTGCCAG	GAAGCCCTAGTTGTACATTGC	122
	PmcSSR150	(ATC)6	AAGAAACTGTGAGCCCAAGG	ACCTTTCTCTTCTCCGGCTG	150
	PmcSSR157	(GA)16/ (GA)8 AA (GA)4	GAGGGTTTAGGAGCTCTCGC	CCAATGCTACCCCTGCACTC	157151
	PmcSSR165	(TC)13	CTTGTCAGTCCATTGGCGAG	TAGTATGACATGATTCCGTCC	165
	PmcSSR180	(TG)8	GATCGTCTGCTCATCTGGGCC	TGCACCTTCAAATCTCATCCC	180
	PmcSSR183	(AG)6	AGCCGAGAGATTTCAGAGAGG	CGAGGCCTTCTTCTTCATGG	183
	PmcSSR193	(AAG)7	TCACGTCGTTGTTGAAAGCC	CCCTCCAATAACCCAGTTGC	193
	PmcSSR195	(AT)6 (GT)2	TTGCATTCATCACTGTGGCC	GGAAACTGAGCACACAAGGG	195-201
	PmcSSR202	(GA)7	ATTGCCTGAAATCTGCCCAC	TGTAGCCGTTATGTGCTGTTAC	202
	PmcSSR204	(CT)6	TAACTCGGTCTCCAAACGGC	CGTTTGAGGATGATGGCGTG	204
	PmcSSR218	(CT)9	CATGGCTACGGTTATGGTGC	TTCTTTCGCAGGGAGGAGAC	218
	PmcSSR222	(AG)6	GTGGGATGAGTGATGCGTTG	GCTGGGCACGTGATTCTTAC	222
	PmcSSR224	(TC)14-16	CCCATTCTCTCTCTAGGCGG	CTTCGGCCCTTCTTCTTTGC	224-228
	PmcSSR228	(TG)11,15,16	CAGCTTCAACCGATCTTCGG	TGTTGCAGTTGTTCCTCGTC	228236238
	PmcSSR234	(ATC)11	GCTGGCCAGAGACAATGATC	GATCGATCAATCATCAAGGC	234
	PmcSSR242	(AG)12 AC (AG)3	CATAGCCCGCCTCCTGATC	ACTTCTTTGCTGCGGTGTTC	242
	PmcSSR256	(CT)6	GAACAAGCGCCAAGAATAGG	ACCTCAGTCTCAAGTCCGTC	256
P. vilaboensis	PvlSSR118	(CAT)8,10	CCCATGATGACGTTGGTGAT	AGATCCAACGAGTGATTATGATG	118-124
	PvlSSR136	(AG)6	CAGAGGAGTTACCACCACGAG	CCTTCTTCTTGAACCCTTATTC	136
	PvlSSR136	(AG)7-8	TGGGATGACATCACTCCCTTA	TTCACGTATTCCACCGCTTG	136-138
	PvlSSR159	(TCT)7,9	TGGAGTACAACCCTCGATGC	AGATACTGAAGAAGGCGGCG	159165
	PvlSSR169	(TG)5-6	TGGTTCAATTTCAATCACGTAC	GATGAGCAGGGTTTCAATCCC	169-171
	PvlSSR190	(GTC)6-7	AAGCGCTCTAGATCACTCCC	CGCGGAGCTTTTCTTTGAGA	190-193
	PvlSSR218	(TC)8-11	CATCTCTTCTTCTTGCCGCC	CAACTCCTGCGACGAAGAAC	218-224
	PvlSSR221	(TG)8-9	GAAGGGAAAGACACAGCAGC	GCGATCTCATCCACCCAAAC	221-223
	PvlSSR231	(AAC)10-14	TAGGACTAATAATAAGGGCAAGTG	AGTGCCTATAGAGACAACATCAG	231-243
	PvlSSR237	(GA)6	GTCGCAATCCCAGCCGTC	TCGGAACTAGGCTCTCATGC	237
P. jauruensis	PjuSSR129	(TC)6	ATTAGGGCAAAGGAGGGTGG	TCTCCCATCCGCTAATCCAG	129
	PjuSSR137	(AG)6-7	CCCTTCATTCCTCACGGCAG	GAGGATAGGCTTGGTGGGTG	137-139
	PjuSSR156	(AG)6	TACATATCGAATTCTGTGGAAAG	CTAGTAGTTTCTCTATTTCCTG	156
	PjuSSR160	(TA)7	AATAGCTTTGCGGGTTTGGG	GGGTTTGCTCTGATACCACTG	160
	PjuSSR191	(GA)8	CATCTCAAACCTGGGGTCAAC	CAGCGCCGTCATAATTGCTC	191
	PjuSSR194	(TC)13,15	ACAGTGGTGATGAGGAGTGG	CTTCGGCCCTTCTTCTTTGC	194198
	PjuSSR231	(AAC)11,13,15	GGACTAATAATAAGGGCAAGTGC	AGTGCCTATAGAGACAACATCAG	231237243
	PjuSSR245	(AG)7 AC (AG)2	CGGAGCAGTCGACTTTGAAG	CACTTTCTTCAATCCTCCTCCC	245
P. gounellei	PguSSR117	(TG)6	GAACTGGCTGACGACACATG	TGATAGCACTTGACCGCCC	117
	PguSSR133	(AG)8	CAATGGTTGTGTCGTGGCATC	GCCCATGCTCATTGCCATCTC	133
	PguSSR144	(CAT)8	TCACTAACAACATCATGGGTATACG	GACGGTAGGAAGTGATGAAGAC	144
	PguSSR145	(AG)6	ACTGTACGGACTATGGTGCC	GCTCTCTCCTCCCAGAACTC	145
	PguSSR152	(AG)10	TCCTTTCTGACTGTTGCTTGG	ATGTTCCGCTCTCCTTCACC	152
	PguSSR158	(CA)9	TTCTTGCACCCTTTGTCAGATTC	TTGCTGGGTCGCATGGGTTTG	158
	PguSSR166	(AAC)6	TGGTCTGGTTGTATGTGCATTG	CTCCGTAGTCATCCAGGGTG	166
	PguSSR167	(AG)7	GGGTTTCGATTTCACCGTCC	GTCGCAACTCTTGGCTTCC	167
	PguSSR170	(GT)6	GATGAAGGATGTTGGCGGTG	GTCAGTGTTGGGCCAGAATG	170
	PguSSR173	(AG)8	CAGAAATCAAACTAAATCATCAATC	GACAACCAAGGCCCAAAGAG	173
	PguSSR193	(AT)6	GATGTTGAGCGATCAAGTTG	AGGGACGCCAAATTACCATTC	193
	PguSSR194	(AAG)8	TCACCTCCAACTACTTCTTATCAC	AGGGAACAAGTACGAAAGCATTC	194
	PguSSR216	(ATG)5 ATA (ATG)6	TGGAAATTTCAGATTATACAATG	AGAGCGGTTAGGTGTGGAAG	216
	PguSSR241	(AG)7	TTCTTTGCAGAGGGAGGTGG	AAATGCGCCCTTCAGCTTTC	241
	PguSSR244	(CA)6	TCGTACAAGCCTTAACTCTTCC	CATTTCCTACCTCGATGATGC	244
P. machrisii	PaSSR118	(AG)7	CTAGGGTTCCGGYGTGTTGA	CTTATAAGGGATATCAAGTGTG	118
P. jauruensis
P. aurisetus	PaSSR145	TC TT (TC)6	ACGTCCCCTCCTTCAAGC	GAATCACATCCCTGCCAAAT	145
P. machrisii
P. machrisii	PaSSR149	(AG)6	GCCGCTGATACTCTCGACAC	TTTCACGACCCATGCTTGAC	143
P. vilaboensis
P. machrisii	PaSSR165	(CAT)11-13	TTATACCCATGATGACGTTGGTG	CAATGAGTCTGGGTGGACCAAG	159-165
P. jauruensis		(CAT)8-9			150-153
P. machrisii	PaSSR181	AG AC (AG)6,8,10	ATATGGCTCCACTTACCAAGC	CAATGCCAGTGGTGAAGGTG	181-187
P. jauruensis		(AG)6			181
P. machrisii	PaSSR183	(GA)3 GT (GA)7-11	CCCACACCAGTTCACTCAAG	AGTCCTCCGAGAAGTTGCTG	185-193
P. vilaboensis		(GA)3 GT (GA)7-11			185-193
P. jauruensis		(GA)3 GT (GA)8-9			187-189
P. aurisetus	PaSSR194	(GA)6	TCTTGAGGTGGGTTGGAGAG	CTTCAACAATGGCGAACGCTG	193
P. machrisii		(GA)6-7			193-195
P. vilaboensis		(GA)6			193
P. aurisetus	PaSSR209	(TGT)6	ATAAGCGGGACCCACACTG	ATAAGCGGGACCCACACTG	207
P. machrisii					207
P. vilaboensis					209
P. jauruensis					207
